# Supplementary material
Source: Springer Nature journal article supplement (https://www.springermedizin.de/resource/supplementary/12895_2013_175_MOESM1_ESM.pdf/9514214)

**a**

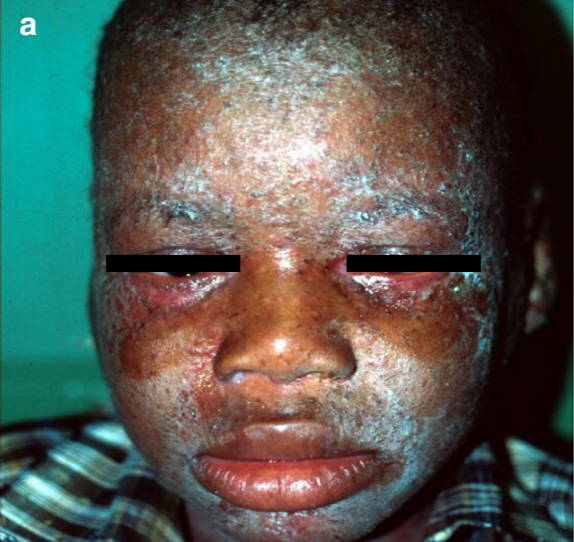

**b**

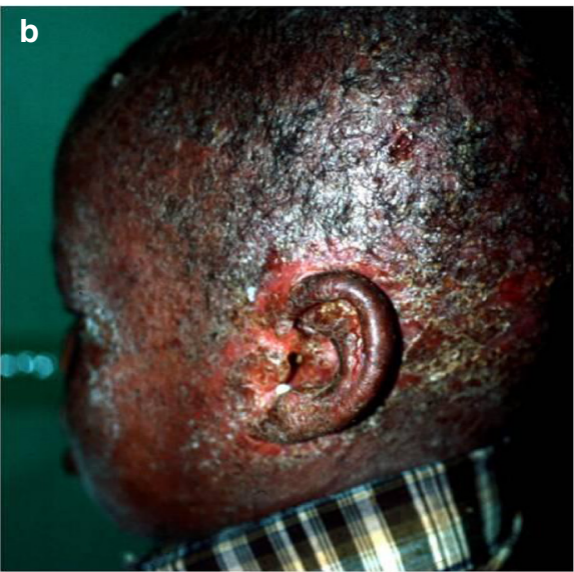

Supplement: MOESM1 [file 9514214]
